# Supplementary material for: Low thyroid hormone receptor alpha-2 (THRα-2) tumor expression is associated with unfavorable tumor characteristics and high breast cancer mortality
Source: Springer Nature journal article supplement (doi:10.1186/s13058-021-01496-7), 2021-12-01
Supplement: MOESM1 [file 19970120]

Supplementary Table 1. Pooled imputed values and original values.

|                             |                 | Imputed (N=654) | Original (N=654) |
|-----------------------------|-----------------|-----------------|------------------|
| Surrogate intrinsic subtype | Luminal A-like  | 55.5            | 54.5             |
|                             | Luminal B-like  | 25.3            | 25.0             |
|                             | HER2+           | 9.6             | 10.5             |
|                             | Triple-negative | 9.6             | 10.0             |
|                             | Missing         |                 | 21.7             |
| Tumor size (mm)             | ≤10             | 19.8            | 19.8             |
|                             | 11-20           | 48.7            | 48.7             |
|                             | 21-50           | 28.2            | 28.3             |
|                             | >50             | 3.2             | 3.2              |
|                             | Missing         |                 | 0.5              |
| Axillary lymph nodes        | No              | 65.8            | 64.9             |
|                             | Yes             | 34.2            | 35.1             |
|                             | Missing         |                 | 4.6              |
| Grade                       | Grade I         | 24.4            | 24.3             |
|                             | Grade II        | 48.1            | 48.1             |
|                             | Grade III       | 27.5            | 27.6             |
|                             | Missing         |                 | 1.4              |
| ER                          | ≤10%            | 11.9            | 11.5             |
|                             | >10%            | 88.1            | 88.5             |
|                             | Missing         |                 | 6.0              |
| PgR                         | ≤10%            | 42.9            | 40.7             |
|                             | >10%            | 57.1            | 59.3             |
|                             | Missing         |                 | 9.5              |
| HER2                        | Negative        | 90.4            | 90.5             |
|                             | Positive        | 9.6             | 9.5              |
|                             | Missing         |                 | 13.1             |
| Ki67                        | Low             | 40.6            | 39.5             |
|                             | Intermediate    | 31.3            | 32.4             |
|                             | High            | 28.0            | 28.1             |
|                             | Missing         |                 | 22.2             |

Data is presented as valid column % and missing data is presented in total column %. Missing not presented if no missing values.

Supplementary Table 2a. Mortality status and treatment among the 654 women included in survival analyses. Data is presented as valid column % and missing data is presented in total column %.

|                    |                    | Alive (N=397) | Breast cancer death (N=119) | Other death (N=135) | Emigrated/Unknown (N=3) |
|--------------------|--------------------|---------------|-----------------------------|---------------------|-------------------------|
| Radiotherapy       | No                 | 32.6          | 36.2                        | 45.6                | 100.0                   |
|                    | Yes                | 67.4          | 63.8                        | 54.4                | 0.0                     |
|                    | Missing            | 10.3          | 2.5                         | 7.4                 | 0.0                     |
| Chemotherapy       | No                 | 83.1          | 70.7                        | 92.0                | 100.0                   |
|                    | Yes                | 16.9          | 29.3                        | 8.0                 | 0.0                     |
|                    | Missing            | 10.6          | 2.5                         | 7.4                 | 0.0                     |
| Hormone therapy    | No                 | 39.6          | 35.9                        | 42.1                | 33.3                    |
|                    | Yes                | 60.4          | 64.1                        | 57.9                | 66.7                    |
|                    | Missing            | 2.0           | 1.7                         | 1.5                 | 0.0                     |
| Surgical treatment | Mastectomy         | 36.0          | 65.8                        | 44.0                | 33.3                    |
|                    | Partial Mastectomy | 63.8          | 34.2                        | 56.0                | 66.7                    |
|                    | Biopsy only        | 0.3           | 0.0                         | 0.0                 | 0.0                     |
|                    | Missing            | 2.0           | 1.7                         | 7.4                 | 0.0                     |

Supplementary Table 2b. THR $\alpha$ -2 status and treatment modalities among the 654 women included in survival analyses. Data is presented as valid column % and missing data is presented in total column %.

|                    |                    | Low  | High |
|--------------------|--------------------|------|------|
| Radiotherapy       | No                 | 34.9 | 37.7 |
|                    | Yes                | 65.1 | 62.3 |
|                    | Missing            | 8.1  | 8.4  |
| Chemotherapy       | No                 | 76.4 | 88.3 |
|                    | Yes                | 23.6 | 11.7 |
|                    | Missing            | 8.1  | 8.7  |
| Hormone therapy    | No                 | 39.5 | 39.3 |
|                    | Yes                | 60.5 | 60.7 |
|                    | Missing            | 1.6  | 2.0  |
| Surgical treatment | Mastectomy         | 48.3 | 38.3 |
|                    | Partial Mastectomy | 51.3 | 61.7 |
|                    | Biopsy only        | 0.3  | 0.0  |
|                    | Missing            | 2.9  | 3.2  |

Supplementary Table 3. THR $\alpha$ -2 expression, hazard ratios (HR) with 95% confidence intervals (CI) and Freedmans%, adjusted for a single factor at a time.

| Endpoint                         | THR $\alpha$ -2 | HR <sup>1</sup><br>(95% CI) | HR <sup>2</sup><br>(95% CI) | HR <sup>3</sup><br>(95% CI) | HR <sup>4</sup><br>(95% CI) | HR <sup>5</sup><br>(95% CI) | HR <sup>6</sup><br>(95% CI) | HR <sup>7</sup><br>(95% CI) | HR <sup>8</sup><br>(95% CI) |
|----------------------------------|-----------------|-----------------------------|-----------------------------|-----------------------------|-----------------------------|-----------------------------|-----------------------------|-----------------------------|-----------------------------|
| Breast cancer specific mortality | Low             | 1.13 (0.77-1.65)            | 1.25 (0.85-1.82)            | 1.19 (0.80-1.77)            | 1.33 (0.92-1.92)            | 1.35 (0.94-1.95)            | 1.09 (0.75-1.58)            | 1.14 (0.79-1.64)            | 1.28 (0.89-1.84)            |
|                                  | High            | 1                           | 1                           | 1                           | 1                           | 1                           | 1                           | 1                           | 1                           |
|                                  | Freedmans%      | 60.3%                       | 27.4%                       | 43.4%                       | 7.3%                        | 2.4%                        | 72.0%                       | 57.4%                       | 19.7%                       |
| Overall mortality                | Low             | 0.94 (0.72-1.21)            | 1.00 (0.77-1.29)            | 1.01 (0.77-1.32)            | 1.02 (0.79-1.30)            | 1.04 (0.81-1.33)            | 0.92 (0.71-1.18)            | 0.93 (0.72-1.19)            | 1.01 (0.79-1.30)            |
|                                  | High            | 1                           | 1                           | 1                           | 1                           | 1                           | 1                           | 1                           | 1                           |

<sup>1</sup>Adjusted for: Surrogate intrinsic subtypes

<sup>2</sup>Adjusted for: ER

<sup>3</sup>Adjusted for: PgR

<sup>4</sup>Adjusted for: HER2

<sup>5</sup>Adjusted for: Ki67

<sup>6</sup>Adjusted for: Histological grade

<sup>7</sup>Adjusted for: Tumor size

<sup>8</sup>Adjusted for: ALNI

Freedmans %: Calculated as  $100 * (1 - \log(\text{HR}^{\text{adjusted}}) / \log(\text{HR}^{\text{undadjusted}}))$ ,  $\text{HR}^{\text{undadjusted}} = 1.36$ .

Supplementary table 4. Hazard ratios (HR) and 95% confidence intervals (CI) for overall mortality per THR $\alpha$ -2 expression, stratified for ER-status and surrogate intrinsic subtype.

| Strata                        | Endpoint                         | THR $\alpha$ -2 | Cases* | Deaths* | HR <sup>crude</sup><br>(95% CI) | HR <sup>1</sup><br>(95% CI) | HR <sup>2</sup><br>(95% CI) |
|-------------------------------|----------------------------------|-----------------|--------|---------|---------------------------------|-----------------------------|-----------------------------|
| ER+                           | Breast cancer specific mortality | Low             | 250    | 52      | 1.43 (0.95-2.14)                | 1.54 (1.02-2.33)            | 1.25 (0.83-1.90)            |
|                               |                                  | High            | 326    | 45      | 1                               | 1                           | 1                           |
|                               | Overall mortality                | Low             | 250    | 104     | 1.10 (0.43-1.44)                | 1.31 (1.01-1.73)            | 1.16 (0.88-1.53)            |
|                               |                                  | High            | 326    | 115     | 1                               | 1                           | 1                           |
| ER-                           | Breast cancer specific mortality | Low             | 59     | 15      | 0.58 (0.23-1.51)                | 0.55 (0.21-1.41)            | 0.31 (0.10-0.98)            |
|                               |                                  | High            | 19     | 7       | 1                               | 1                           | 1                           |
|                               | Overall mortality                | Low             | 59     | 23      | 0.48 (0.23-1.01)                | 0.44 (0.21-0.94)            | 0.27 (0.11-0.65)            |
|                               |                                  | High            | 19     | 12      | 1                               | 1                           | 1                           |
| Luminal A-like                | Breast cancer specific mortality | Low             | 135    | 24      | 1.23 (0.66-2.28)                | 1.49 (0.79-2.81)            | 1.22 (0.64-2.33)            |
|                               |                                  | High            | 227    | 19      | 1                               | 1                           | 1                           |
|                               | Overall mortality                | Low             | 135    | 44      | 0.86 (0.59-1.25)                | 1.15 (0.78-1.70)            | 1.04 (0.70-1.54)            |
|                               |                                  | High            | 227    | 75      | 1                               | 1                           | 1                           |
| Luminal B-like                | Breast cancer specific mortality | Low             | 90     | 24      | 1.52 (0.75-3.08)                | 1.52 (0.75-3.08)            | 1.40 (0.68-2.86)            |
|                               |                                  | High            | 76     | 13      | 1                               | 1                           | 1                           |
|                               | Overall mortality                | Low             | 90     | 43      | 1.28 (0.77-2.11)                | 1.32 (0.80-2.19)            | 1.25 (0.75-2.08)            |
|                               |                                  | High            | 76     | 28      | 1                               | 1                           | 1                           |
| HER2+                         | Breast cancer specific mortality | Low             | 37     | 10      | 0.69 (0.27-1.78)                | 0.69 (0.27-1.80)            | 0.68 (0.23-2.00)            |
|                               |                                  | High            | 26     | 11      | 1                               | 1                           | 1                           |
|                               | Overall mortality                | Low             | 37     | 20      | 0.95 (0.46-1.98)                | 1.00 (0.48-2.06)            | 0.99 (0.44-2.26)            |
|                               |                                  | High            | 26     | 15      | 1                               | 1                           | 1                           |
| Triple-negative breast cancer | Breast cancer specific mortality | Low             | 47     | 13      | 0.81 (0.26-2.49)                | 0.79 (0.26-2.42)            | 0.36 (0.10-1.32)            |
|                               |                                  | High            | 16     | 5       | 1                               | 1                           | 1                           |
|                               | Overall mortality                | Low             | 47     | 20      | 0.55 (0.24-1.24)                | 0.54 (0.24-1.24)            | 0.28 (0.10-0.74)            |
|                               |                                  | High            | 16     | 9       | 1                               | 1                           | 1                           |

<sup>1</sup> Adjusted for: age at diagnosis.

<sup>2</sup> Adjusted for age at diagnosis, tumor size and axillary lymph node involvement

\* The number of individuals and deaths is presented as the mean of all 25 imputed datasets. Since ER-status and the other tumor characteristics that define surrogate intrinsic subtype were imputed if missing, the number of individuals and deaths in a strata can differ between each imputed dataset.
